# Supplementary material for: Uncovering the origins of supramolecular similarity in a series of benzimidazole structures
Source: Royal Society of Chemistry journal article supplement (doi:10.1039/d2ce00909a), 2022-01-01
Supplement: d2ce00909a1.pdf [file d2ce00909a1.pdf]

## SUPPORTING INFORMATION

### Uncovering the Origins of Supramolecular Similarity in a Series of Benzimidazole Structures

Tainára Orlando<sup>1</sup>, Leandro C. Lopes<sup>2</sup>, Darlon A. M. Neumann<sup>2</sup>, Valquiria P. Andrade<sup>2</sup>,  
Mateus Mittersteiner<sup>2</sup>, Cláudia Q. Rocha<sup>1</sup>, Nilo Zanatta<sup>2</sup>, Helio G. Bonacorso<sup>2</sup>, Marcos  
A. P. Martins<sup>2</sup>, and Paulo R. S. Salbego<sup>3\*</sup>

<sup>1</sup>Department of Chemistry, Federal University of Maranhão (UFMA), São Luís, MA,  
Brazil.

<sup>2</sup>Núcleo de Química de Heterociclos (NUQUIMHE), Department of Chemistry, Federal  
University of Santa Maria (UFSM), Santa Maria, RS, Brazil.

<sup>3</sup>Núcleo de Química de Heterociclos (NUQUIMHE), Department of Engineering and  
Environmental Technology (DETA), Federal University of Santa Maria (UFSM),  
Frederico Westphalen Campus, RS, Brazil.

*\*E-mail: paulosalbego@gmail.com*

|                                              |    |
|----------------------------------------------|----|
| 1. Crystallographic data.....                | 2  |
| 2. Supramolecular Cluster Data.....          | 3  |
| 3. Similarity Indices.....                   | 10 |
| 4. Crystallization mechanism proposals ..... | 16 |
| 5. QTAIM data .....                          | 18 |
| 6. Abbreviation List.....                    | 19 |

## 1. Crystallographic data

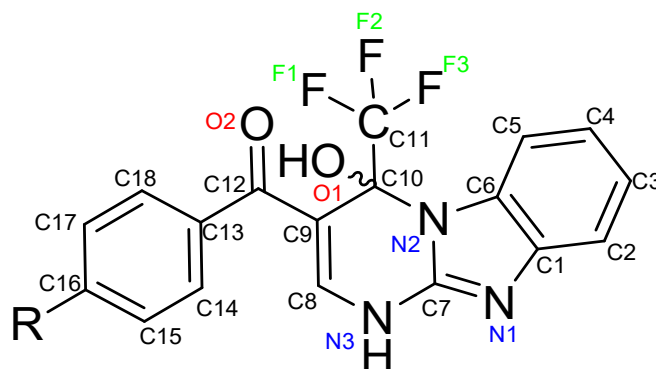

**Figure S1.** Numbering of atoms in crystalline structures of compounds **2** – **5**.

**Table S1.** Crystallographic data of compounds **2** - **5**.

| Compound                                                       | <b>2</b>                                                                     | <b>3</b>                                                                     | <b>4</b>                                                                       | <b>5</b>                                                                       |
|----------------------------------------------------------------|------------------------------------------------------------------------------|------------------------------------------------------------------------------|--------------------------------------------------------------------------------|--------------------------------------------------------------------------------|
| Formula                                                        | C <sub>19</sub> H <sub>14</sub> F <sub>3</sub> N <sub>3</sub> O <sub>2</sub> | C <sub>19</sub> H <sub>14</sub> F <sub>3</sub> N <sub>3</sub> O <sub>3</sub> | C <sub>18</sub> H <sub>11</sub> ClF <sub>3</sub> N <sub>3</sub> O <sub>2</sub> | C <sub>18</sub> H <sub>11</sub> BrF <sub>3</sub> N <sub>3</sub> O <sub>2</sub> |
| Formula weight                                                 | 373.337                                                                      | 389.337                                                                      | 393.755                                                                        | 438.206                                                                        |
| Temperature (K)                                                | 100                                                                          | 110                                                                          | 293.15                                                                         | 100                                                                            |
| Crystal system                                                 | Monoclinic                                                                   | Monoclinic                                                                   | Monoclinic                                                                     | Monoclinic                                                                     |
| Space group                                                    | P2 <sub>1</sub> /n                                                           | P2 <sub>1</sub> /n                                                           | P2 <sub>1</sub> /n                                                             | P2 <sub>1</sub> /n                                                             |
| a (Å)                                                          | 6.0391(2)                                                                    | 6.0869(3)                                                                    | 6.0309(11)                                                                     | 5.9853(2)                                                                      |
| b (Å)                                                          | 15.7043(6)                                                                   | 15.3931(8)                                                                   | 15.898(2)                                                                      | 15.8708(5)                                                                     |
| c (Å)                                                          | 17.1155(6)                                                                   | 17.5350(9)                                                                   | 17.1914(16)                                                                    | 17.1004(6)                                                                     |
| α (°)                                                          | 90                                                                           | 90                                                                           | 90                                                                             | 90                                                                             |
| β (°)                                                          | 91.874(1)                                                                    | 92.951(2)                                                                    | 90.932(7)                                                                      | 90.897(1)                                                                      |
| γ (°)                                                          | 90                                                                           | 90                                                                           | 90                                                                             | 90                                                                             |
| Cell volume (Å <sup>3</sup> )                                  | 1622.36(10)                                                                  | 1640.79(14)                                                                  | 1648.1(4)                                                                      | 1624.19(9)                                                                     |
| Z                                                              | 4                                                                            | 4                                                                            | 4                                                                              | 4                                                                              |
| Calculated density (g cm <sup>-3</sup> )                       | 1.528                                                                        | 1.576                                                                        | 1.587                                                                          | 1.792                                                                          |
| μ (mm <sup>-1</sup> )                                          | 0.125                                                                        | 0.131                                                                        | 2.545                                                                          | 2.584                                                                          |
| F(000)                                                         | 768.6                                                                        | 800.7                                                                        | 804.6                                                                          | 871.9                                                                          |
| Crystal size (mm <sup>3</sup> )                                | 0.162 × 0.13 × 0.062                                                         | 0.162 × 0.154 × 0.102                                                        | 0.449 × 0.22 × 0.156                                                           | 0.219 × 0.082 × 0.064                                                          |
| Radiation                                                      | Mo Kα (λ = 0.71073)                                                          | Mo Kα (λ = 0.71073)                                                          | Cu Kα (λ = 1.54178)                                                            | Mo Kα (λ = 0.71073)                                                            |
| 2θ range for data collection (°)                               | 4.76 to 54.3                                                                 | 4.66 to 54.4                                                                 | 11.14 to 145.26                                                                | 4.76 to 54.26                                                                  |
| Index ranges                                                   | -7 ≤ h ≤ 7, -20 ≤ k ≤ 20, -21 ≤ l ≤ 21                                       | -7 ≤ h ≤ 7, -19 ≤ k ≤ 19, -22 ≤ l ≤ 22                                       | -7 ≤ h ≤ 7, -19 ≤ k ≤ 19, -21 ≤ l ≤ 20                                         | -7 ≤ h ≤ 7, -20 ≤ k ≤ 20, -21 ≤ l ≤ 20                                         |
| Reflections collected                                          | 47272                                                                        | 45928                                                                        | 24123                                                                          | 29911                                                                          |
| Independent reflections                                        | 3589 [R <sub>int</sub> = 0.0380, R <sub>sigma</sub> = 0.0181]                | 3656 [R <sub>int</sub> = 0.0863, R <sub>sigma</sub> = 0.0340]                | 3209 [R <sub>int</sub> = 0.0265, R <sub>sigma</sub> = 0.0163]                  | 3593 [R <sub>int</sub> = 0.0323, R <sub>sigma</sub> = 0.0193]                  |
| Data/ restraints/ parameters                                   | 3589/0/263                                                                   | 3656/0/255                                                                   | 3209/0/245                                                                     | 3593/0/245                                                                     |
| Goodness-of-fit on F <sup>2</sup>                              | 1.056                                                                        | 1.068                                                                        | 1.047                                                                          | 1.034                                                                          |
| Final R indexes [I >= 2σ (I)]                                  | R <sub>1</sub> = 0.0396, wR <sub>2</sub> = 0.0950                            | R <sub>1</sub> = 0.0459, wR <sub>2</sub> = 0.1111                            | R <sub>1</sub> = 0.0388, wR <sub>2</sub> = 0.1071                              | R <sub>1</sub> = 0.0260, wR <sub>2</sub> = 0.0565                              |
| Final R indexes [all data]                                     | R <sub>1</sub> = 0.0502, wR <sub>2</sub> = 0.1009                            | R <sub>1</sub> = 0.0593, wR <sub>2</sub> = 0.1199                            | R <sub>1</sub> = 0.0419, wR <sub>2</sub> = 0.1103                              | R <sub>1</sub> = 0.0335, wR <sub>2</sub> = 0.0594                              |
| Δ ρ <sub>max.</sub> , Δ ρ <sub>min.</sub> (e Å <sup>-3</sup> ) | 0.36, -0.31                                                                  | 0.61, -0.42                                                                  | 0.23, -0.35                                                                    | 0.51, -0.43                                                                    |

## 2. Supramolecular Cluster Data

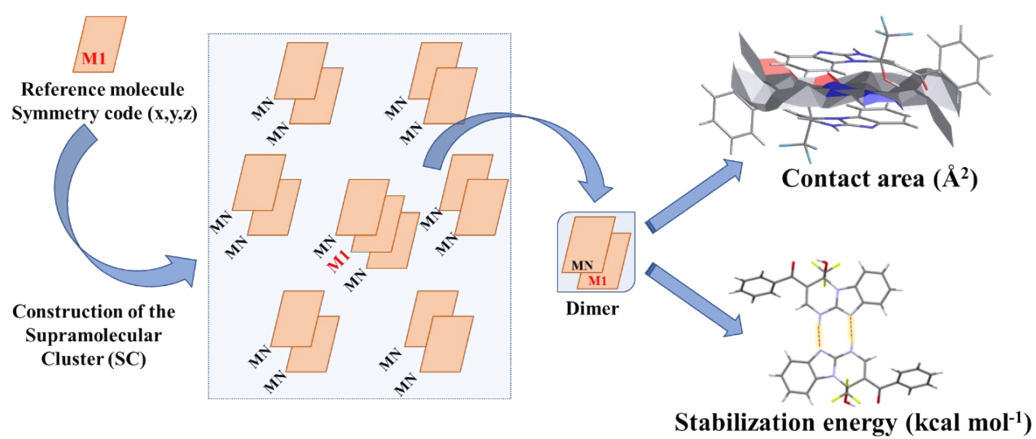

**Figure S2.** Construction of the supramolecular cluster (SC).

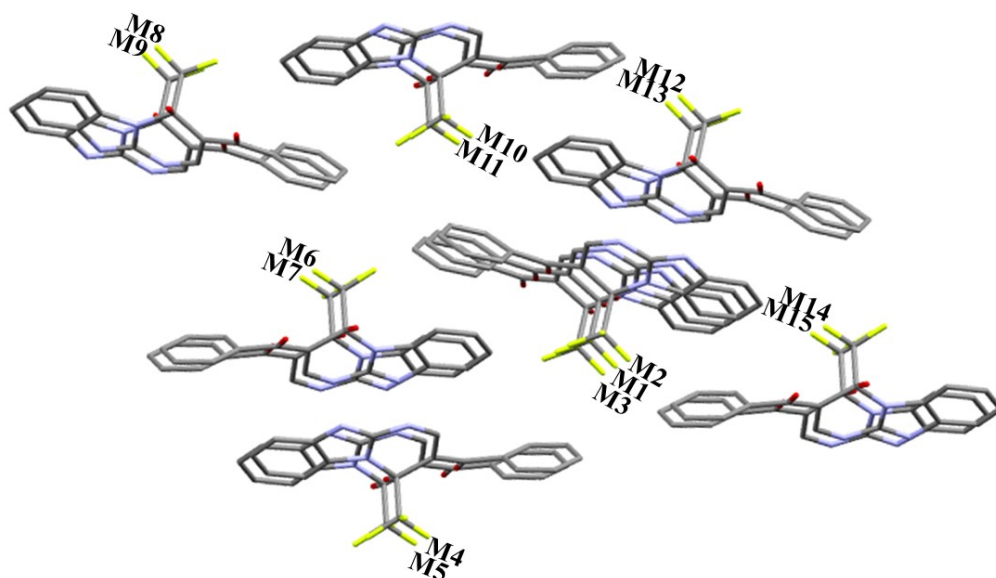

**Figure S3.** Supramolecular cluster of compound 1.

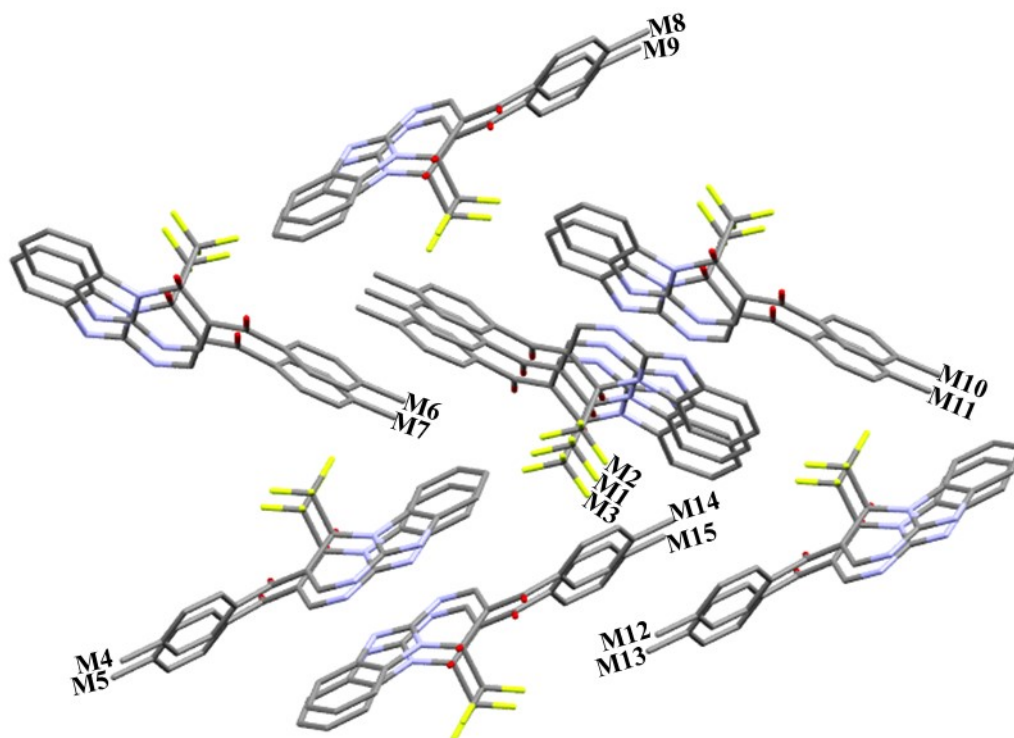

**Figure S4.** Supramolecular cluster of compound 2.

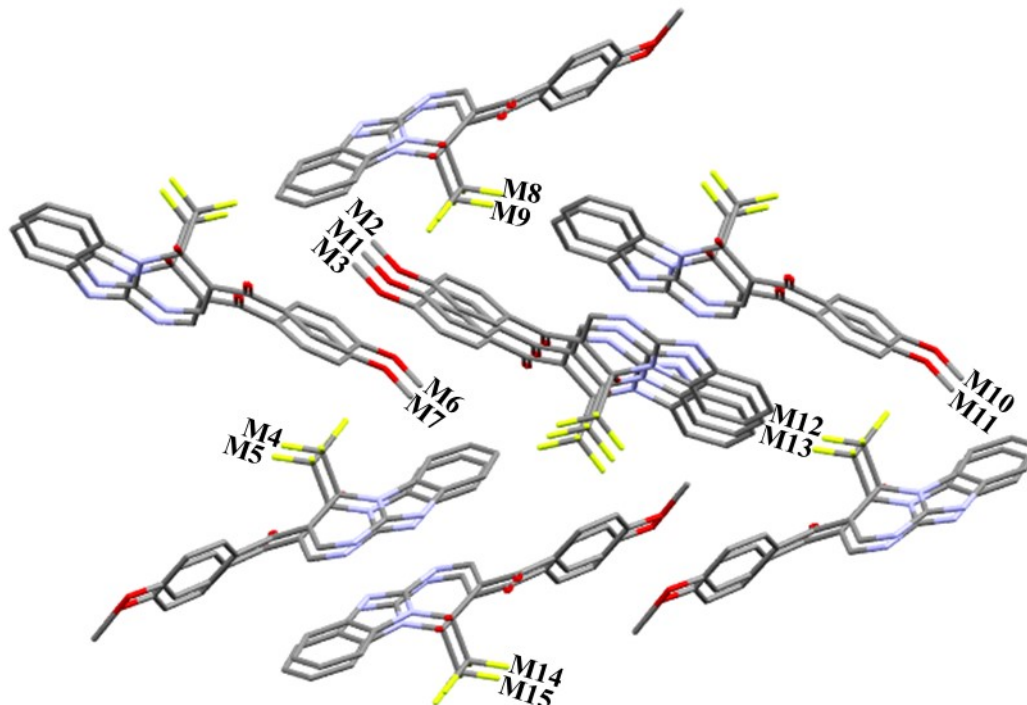

**Figure S5.** Supramolecular cluster of compound 3.

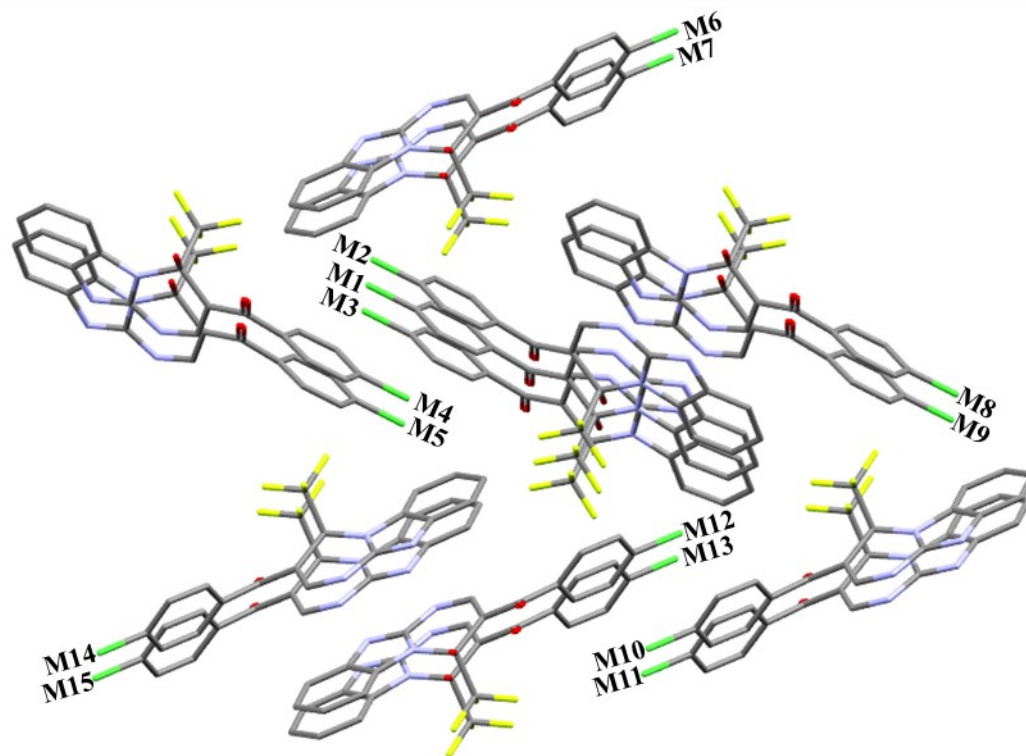

**Figure S6.** Supramolecular cluster of compound 4.

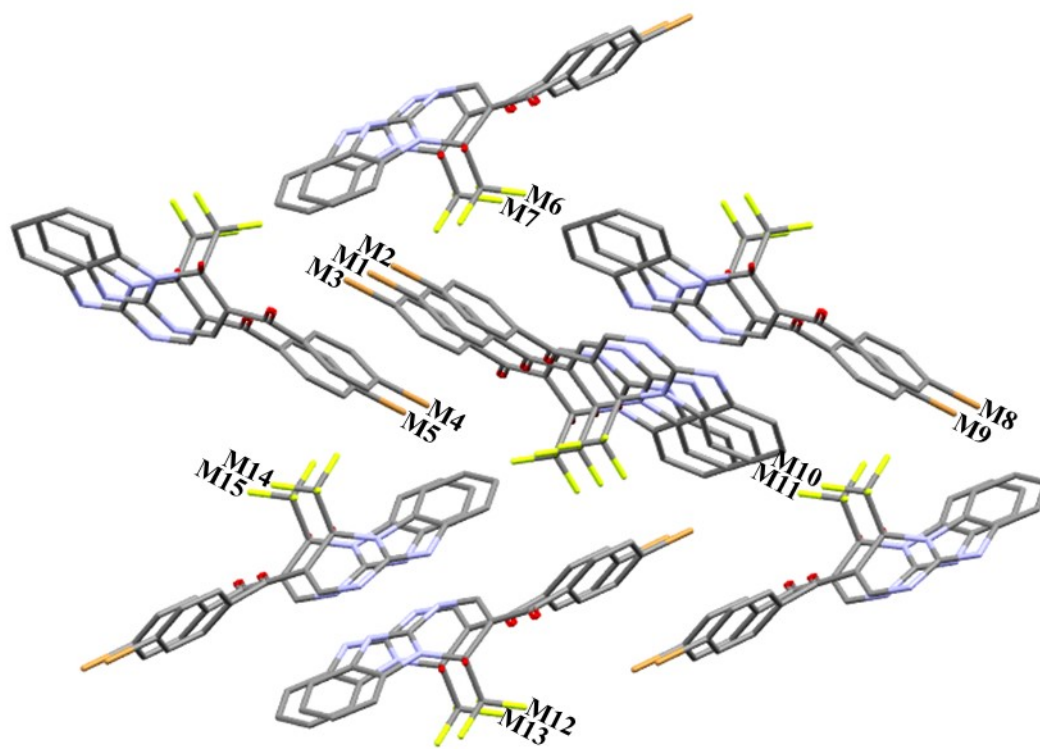

**Figure S7.** Supramolecular cluster of compound 5.

**Table S2.** Symmetry codes for the molecules of the supramolecular cluster of compounds **1-3**.

| MN  | <b>1</b>            | <b>2</b>            | <b>3</b>            |
|-----|---------------------|---------------------|---------------------|
| M1  | x,y,z               | x,y,z               | x,y,z               |
| M2  | 1+x,y,z             | 1+x,y,z             | 1+x,y,z             |
| M3  | -1+x,y,z            | -1+x,y,z            | -1+x,y,z            |
| M4  | 1/2+x,1.5-y,1/2+z   | 1/2+x,1/2-y,1/2+z   | 1/2+x,1.5-y,1/2+z   |
| M5  | -1/2+x,1.5-y,1/2+z  | -1/2+x,1/2-y,1/2+z  | -1/2+x,1.5-y,1/2+z  |
| M6  | 1.5-x,1/2+y,1.5-z   | 2-x,1-y,2-z         | 5-x,2-y,3-z         |
| M7  | 1/2-x,1/2+y,1.5-z   | 1-x,1-y,2-z         | 4-x,2-y,3-z         |
| M8  | 1-x,2-y,1-z         | 1.5-x,1/2+y,1.5-z   | 4.5-x,1/2+y,2.5-z   |
| M9  | -x,2-y,1-z          | 1/2-x,1/2+y,1.5-z   | 3.5-x,1/2+y,2.5-z   |
| M10 | 1/2+x,1.5-y,-1/2+z  | 2-x,1-y,1-z         | 5-x,2-y,2-z         |
| M11 | -1/2+x,1.5-y,-1/2+z | 1-x,1-y,1-z         | 4-x,2-y,2-z         |
| M12 | 2-x,1-y,1-z         | 1/2+x,1/2-y,-1/2+z  | 1/2+x,1.5-y,-1/2+z  |
| M13 | 1-x,1-y,1-z         | -1/2+x,1/2-y,-1/2+z | -1/2+x,1.5-y,-1/2+z |
| M14 | 1.5-x,-1/2+y,1.5-z  | 1.5-x,-1/2+y,1.5-z  | 4.5-x,-1/2+y,2.5-z  |
| M15 | 1/2-x,-1/2+y,1.5-z  | 1/2-x,-1/2+y,1.5-z  | 3.5-x,-1/2+y,2.5-z  |

**Table S3.** Symmetry codes for the molecules of the supramolecular cluster of compounds **4 and 5**.

| MN  | <b>4</b>            | <b>5</b>             |
|-----|---------------------|----------------------|
| M1  | x,y,z               | x,y,z                |
| M2  | 1+x,y,z             | 1+x,y,z              |
| M3  | -1+x,y,z            | -1+x,y,z             |
| M4  | 2-x,1-y,2-z         | 1-x,-y,1-z           |
| M5  | 1-x,1-y,2-z         | -x,-y,1-z            |
| M6  | 1.5-x,1/2+y,1.5-z   | 1/2-x,1/2+y,1/2-z    |
| M7  | 1/2-x,1/2+y,1.5-z   | -1/2-x,1/2+y,1/2-z   |
| M8  | 2-x,1-y,1-z         | 1-x,-y,-z            |
| M9  | 1-x,1-y,1-z         | -x,-y,-z             |
| M10 | 1/2+x,1/2-y,-1/2+z  | 1/2+x,-1/2-y,-1/2+z  |
| M11 | -1/2+x,1/2-y,-1/2+z | -1/2+x,-1/2-y,-1/2+z |
| M12 | 1.5-x,-1/2+y,1.5-z  | 1/2-x,-1/2+y,1/2-z   |
| M13 | 1/2-x,-1/2+y,1.5-z  | -1/2-x,-1/2+y,1/2-z  |
| M14 | 1/2+x,1/2-y,1/2+z   | 1/2+x,-1/2-y,1/2+z   |
| M15 | -1/2+x,1/2-y,1/2+z  | -1/2+x,-1/2-y,1/2+z  |

**Table S4.** Contact area ( $C_{M1...MN}$ ) and stabilization energy ( $G_{M1...MN}$ ) data from the dimers of the supramolecular cluster for compounds **1-3**.

| Dimer    | <b>1</b>      |                 | <b>2</b>      |                 | <b>3</b>      |                 |
|----------|---------------|-----------------|---------------|-----------------|---------------|-----------------|
|          | $C_{M1...MN}$ | $G_{M1...MN}^a$ | $C_{M1...MN}$ | $G_{M1...MN}^a$ | $C_{M1...MN}$ | $G_{M1...MN}^a$ |
| M1...M2  | 49.60         | -7,01           | 42.82         | -6.82           | 39.81         | -6.93           |
| M1...M3  | 49.60         | -7,01           | 42.82         | -6.82           | 39.81         | -6.93           |
| M1...M4  | 11.41         | -1,64           | 20.45         | -2.25           | 21.90         | -2.87           |
| M1...M5  | 3.97          | -1,44           | 14.04         | -1.34           | 12.23         | -1.44           |
| M1...M6  | 36.70         | -6,30           | 16.98         | -1.28           | 20.55         | -2.14           |
| M1...M7  | 37.14         | -4,75           | 31.77         | -7.53           | 35.75         | -9.01           |
| M1...M8  | 16.43         | -0,45           | 28.54         | -5.16           | 31.59         | -5.88           |
| M1...M9  | 1.04          | -0,10           | 24.83         | -2.74           | 25.51         | -3.41           |
| M1...M10 | 3.97          | -1,44           | 24.63         | -17.54          | 24.42         | -17.89          |
| M1...M11 | 11.41         | -1,64           | 68.01         | -20.15          | 68.30         | -20.02          |
| M1...M12 | 23.57         | -1,69           | 14.04         | -1.34           | 12.23         | -1.44           |
| M1...M13 | 73.08         | -2,18           | 20.45         | -2.25           | 21.90         | -2.87           |
| M1...M14 | 36.70         | -6,30           | 28.54         | -5.16           | 31.59         | -5.88           |
| M1...M15 | 37.14         | -4,75           | 24.83         | -2.74           | 25.51         | -3.41           |
| Total    | 391.76        | -80,73          | 402.75        | -83.13          | 411.10        | -90.13          |

<sup>a</sup> Obtained through the equation  $G_{M1...MN} = G_{M1+MN} - (G_{M1} + G_{MN})$ .

**Table S5.** Contact area ( $C_{M1...MN}$ ) and stabilization energy ( $G_{M1...MN}$ ) data from the dimers of the supramolecular cluster for compounds **4** and **5**.

| Dimer    | <b>4</b>      |                 | <b>5</b>      |                 |
|----------|---------------|-----------------|---------------|-----------------|
|          | $C_{M1...MN}$ | $G_{M1...MN}^a$ | $C_{M1...MN}$ | $G_{M1...MN}^a$ |
| M1...M2  | 46.65         | -7.46           | 47.35         | -7.99           |
| M1...M3  | 46.65         | -7.46           | 47.35         | -7.99           |
| M1...M4  | 15.59         | -2.12           | 15.73         | -2.62           |
| M1...M5  | 27.61         | -5.02           | 28.45         | -6.31           |
| M1...M6  | 22.91         | -3.26           | 22.11         | -3.85           |
| M1...M7  | 24.53         | -3.04           | 25.19         | -3.27           |
| M1...M8  | 25.73         | -17.44          | 25.42         | -17.78          |
| M1...M9  | 65.92         | -19.47          | 66.26         | -19.78          |
| M1...M10 | 14.22         | -1.47           | 13.82         | -1.38           |
| M1...M11 | 22.54         | -2.12           | 22.10         | -1.96           |
| M1...M12 | 22.91         | -3.26           | 22.11         | -3.85           |
| M1...M13 | 24.53         | -3.04           | 25.19         | -3.27           |
| M1...M14 | 22.54         | -2.12           | 22.10         | -1.96           |
| M1...M15 | 14.22         | -1.47           | 13.82         | -1.38           |
| Total    | 396.55        | -78.75          | 397.00        | -83.38          |

<sup>a</sup> Obtained through the equation  $G_{M1...MN} = G_{M1+MN} - (G_{M1} + G_{MN})$ .

**Table S6.** Normalized contact area ( $NC_{M1...MN}$ ) and stabilization energy ( $NG_{M1...MN}$ ) data from the dimers of the supramolecular cluster for compounds **1-3**.

| Dimer    | <b>1</b>         |                  | <b>2</b>         |                  | <b>3</b>         |                  |
|----------|------------------|------------------|------------------|------------------|------------------|------------------|
|          | $NC_{M1...MN}^a$ | $NG_{M1...MN}^b$ | $NC_{M1...MN}^a$ | $NG_{M1...MN}^b$ | $NC_{M1...MN}^a$ | $NG_{M1...MN}^b$ |
| M1...M2  | 1.77             | 1.22             | 1.49             | 1.15             | 1.36             | 1.08             |
| M1...M3  | 1.77             | 1.22             | 1.49             | 1.15             | 1.36             | 1.08             |
| M1...M4  | 0.41             | 0.29             | 0.71             | 0.38             | 0.75             | 0.45             |
| M1...M5  | 0.14             | 0.25             | 0.49             | 0.23             | 0.42             | 0.22             |
| M1...M6  | 1.31             | 1.09             | 0.59             | 0.22             | 0.70             | 0.33             |
| M1...M7  | 1.33             | 0.82             | 1.10             | 1.27             | 1.22             | 1.40             |
| M1...M8  | 0.59             | 0.08             | 0.99             | 0.87             | 1.08             | 0.91             |
| M1...M9  | 0.04             | 0.02             | 0.86             | 0.46             | 0.87             | 0.53             |
| M1...M10 | 0.14             | 0.25             | 0.86             | 2.95             | 0.83             | 2.78             |
| M1...M11 | 0.41             | 0.29             | 2.36             | 3.39             | 2.33             | 3.11             |
| M1...M12 | 0.84             | 3.07             | 0.49             | 0.23             | 0.42             | 0.22             |
| M1...M13 | 2.61             | 3.50             | 0.71             | 0.38             | 0.75             | 0.45             |
| M1...M14 | 1.31             | 1.09             | 0.99             | 0.87             | 1.08             | 0.91             |
| M1...M15 | 1.33             | 0.82             | 0.86             | 0.46             | 0.87             | 0.53             |
| Total    | 14.00            | 14.00            | 14.00            | 14.00            | 14.00            | 14.00            |

<sup>a</sup> Obtained through the equation  $NC_{M1...MN} = (C_{M1...MN} / \sum C_{M1...MN}) \times N$ ; <sup>b</sup> Obtained through the equation  $NG_{M1...MN} = (G_{M1...MN} / \sum G_{M1...MN}) \times N$ .

**Table S7.** Normalized contact area ( $NC_{M1...MN}$ ) and stabilization energy ( $NG_{M1...MN}$ ) data from the dimers of the supramolecular cluster for compounds **4 and 5**.

| Dimer    | <b>4</b>         |                  | <b>5</b>         |                  |
|----------|------------------|------------------|------------------|------------------|
|          | $NC_{M1...MN}^a$ | $NG_{M1...MN}^b$ | $NC_{M1...MN}^a$ | $NG_{M1...MN}^b$ |
| M1...M2  | 1.65             | 1.33             | 1.67             | 1.34             |
| M1...M3  | 1.65             | 1.33             | 1.67             | 1.34             |
| M1...M4  | 0.55             | 0.38             | 0.55             | 0.44             |
| M1...M5  | 0.97             | 0.89             | 1.00             | 1.06             |
| M1...M6  | 0.81             | 0.58             | 0.78             | 0.65             |
| M1...M7  | 0.87             | 0.54             | 0.89             | 0.55             |
| M1...M8  | 0.91             | 3.10             | 0.90             | 2.99             |
| M1...M9  | 2.33             | 3.46             | 2.34             | 3.32             |
| M1...M10 | 0.50             | 0.26             | 0.49             | 0.23             |
| M1...M11 | 0.80             | 0.38             | 0.78             | 0.33             |
| M1...M12 | 0.81             | 0.58             | 0.78             | 0.65             |
| M1...M13 | 0.87             | 0.54             | 0.89             | 0.55             |
| M1...M14 | 0.80             | 0.38             | 0.78             | 0.33             |
| M1...M15 | 0.50             | 0.26             | 0.49             | 0.23             |
| Total    | 14.00            | 14.00            | 14.00            | 14.00            |

<sup>a</sup> Obtained through the equation  $NC_{M1...MN} = (C_{M1...MN} / \sum C_{M1...MN}) \times N$ ; <sup>b</sup> Obtained through the equation  $NG_{M1...MN} = (G_{M1...MN} / \sum G_{M1...MN}) \times N$ .



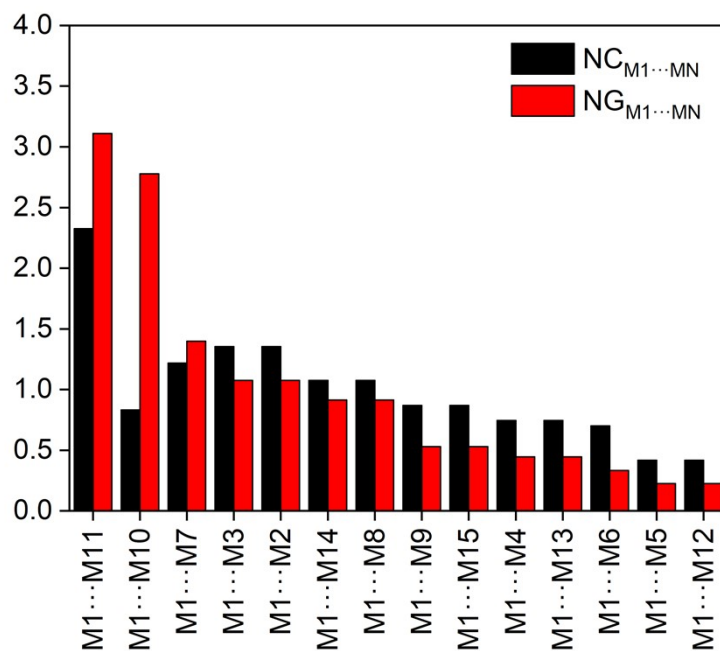

**Figure S8.** Normalized contact area and stabilization energy data ( $NC_{M1...MN}$  and  $NG_{M1...MN}$ ) for compound 3.

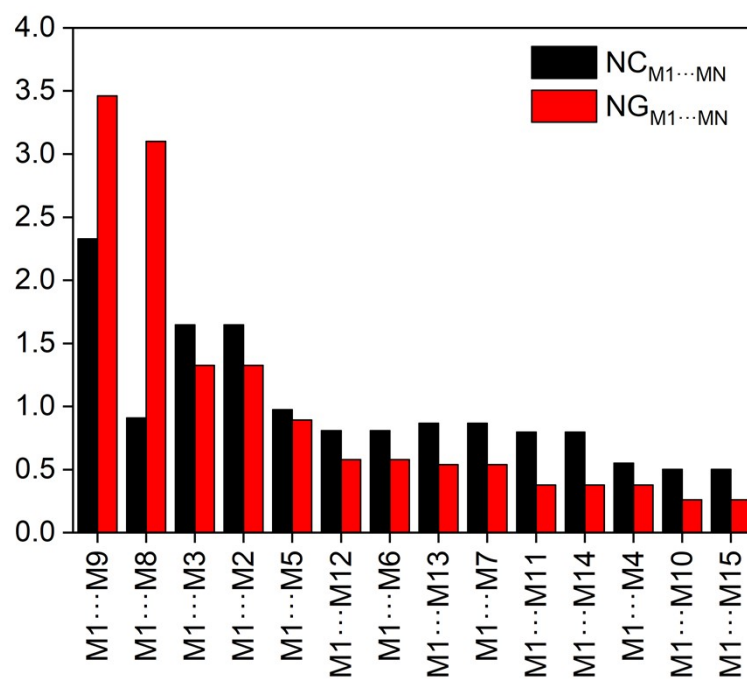

**Figure S9.** Normalized contact area and stabilization energy data ( $NC_{M1...MN}$  and  $NG_{M1...MN}$ ) for compound 4.

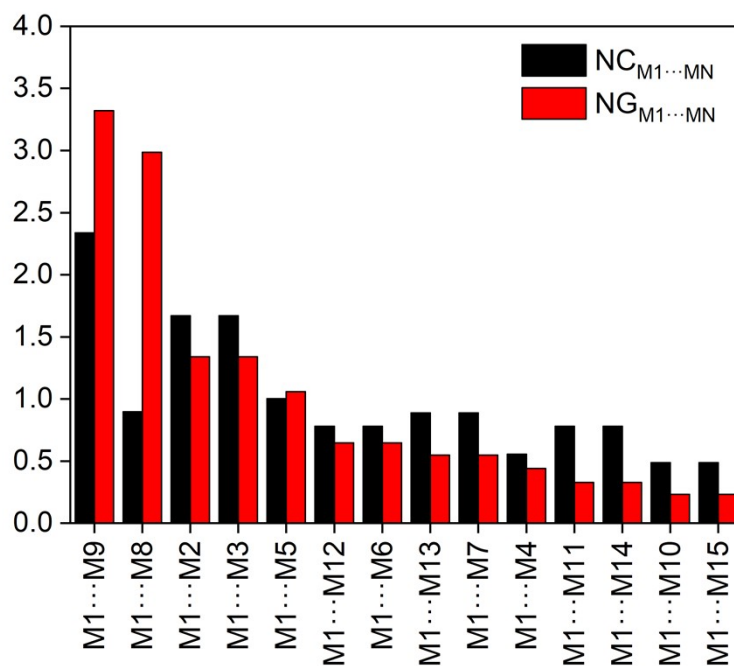

**Figure S10.** Normalized contact area and stabilization energy data ( $NC_{M1...MN}$  and  $NG_{M1...MN}$ ) for compound **5**.

### 3. Similarity Indices

**Table S8.** Similarity indices data ( $I^D$ ,  $I^C$ ,  $I^G$ , and  $I^{DCG}$ ) for all comparisons between compound **1-5**.

| Comparison    | $I^D$ | $I^C$ | $I^G$ | $I^{DCG}$ |
|---------------|-------|-------|-------|-----------|
| <b>1 vs 2</b> | 0.54  | 0.59  | 0.57  | 0.57      |
| <b>1 vs 3</b> | 0.53  | 0.58  | 0.58  | 0.56      |
| <b>1 vs 4</b> | 0.54  | 0.59  | 0.63  | 0.58      |
| <b>1 vs 5</b> | 0.54  | 0.60  | 0.63  | 0.59      |
| <b>2 vs 3</b> | 0.86  | 0.92  | 0.93  | 0.90      |
| <b>2 vs 4</b> | 0.98  | 0.90  | 0.83  | 0.89      |
| <b>2 vs 5</b> | 0.98  | 0.89  | 0.86  | 0.90      |
| <b>3 vs 4</b> | 0.85  | 0.83  | 0.76  | 0.81      |
| <b>3 vs 5</b> | 0.92  | 0.82  | 0.82  | 0.85      |
| <b>4 vs 5</b> | 0.99  | 0.95  | 0.92  | 0.94      |

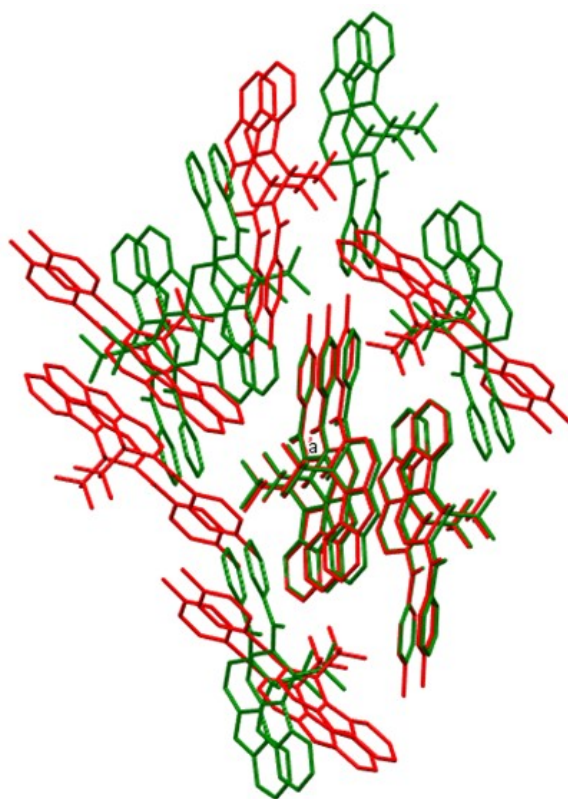

**Figure S11.** Supramolecular cluster overlay of **1** (green) vs. **2** (red).

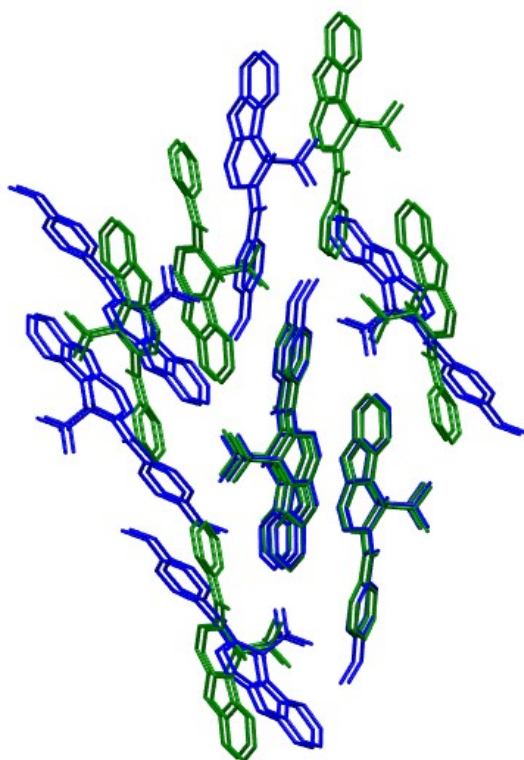

**Figure S12.** Supramolecular cluster overlay of **1** (green) vs. **3** (blue).

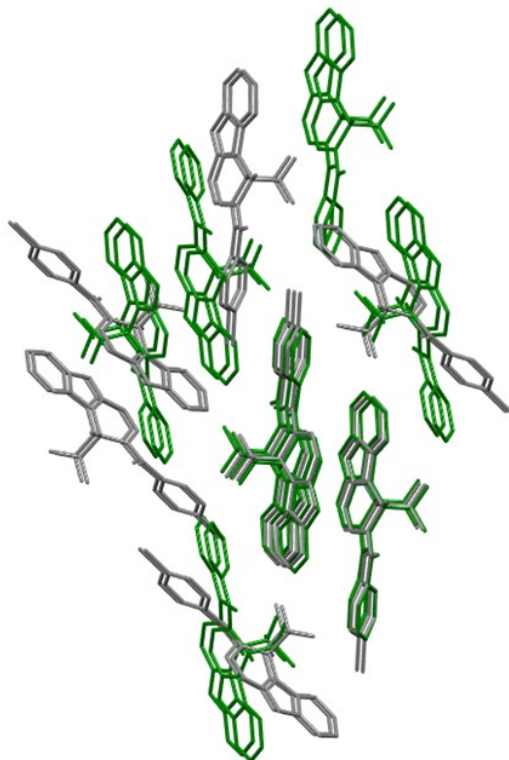

**Figure S13.** Supramolecular cluster overlay of **1** (green) vs. **4** (grey).

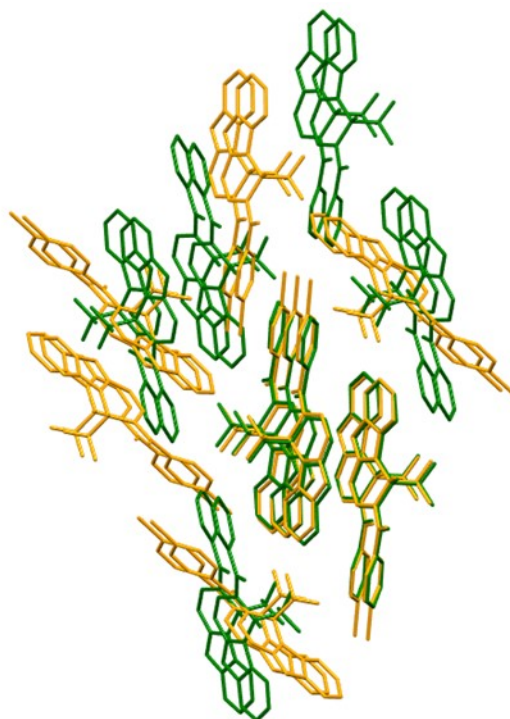

**Figure S14.** Supramolecular cluster overlay of **1** (green) vs. **5** (orange).

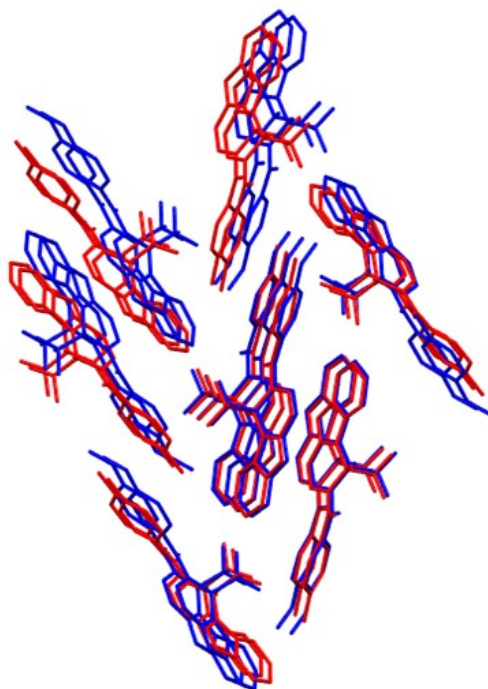

**Figure S15.** Supramolecular cluster overlay of **2** (red) vs. **3** (blue).

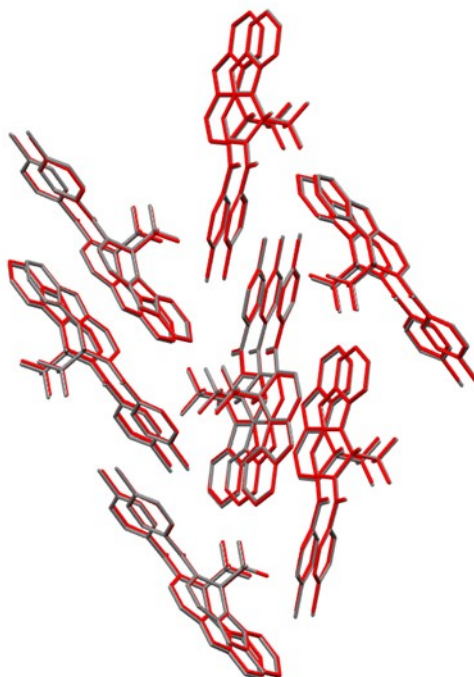

**Figure S16.** Supramolecular cluster overlay of **2** (red) vs. **4** (grey).

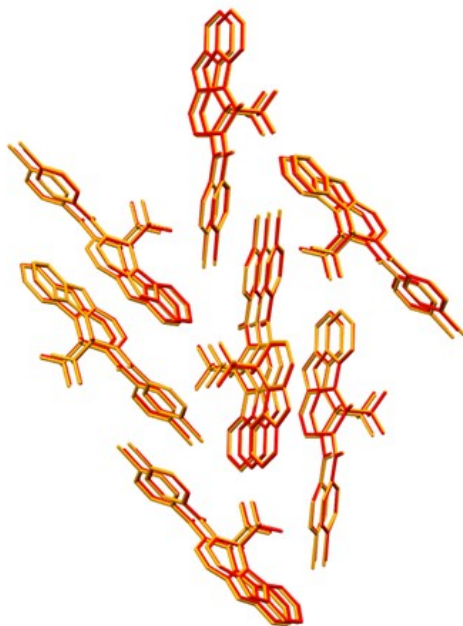

**Figure S17.** Supramolecular cluster overlay of **2** (red) vs. **5** (orange).

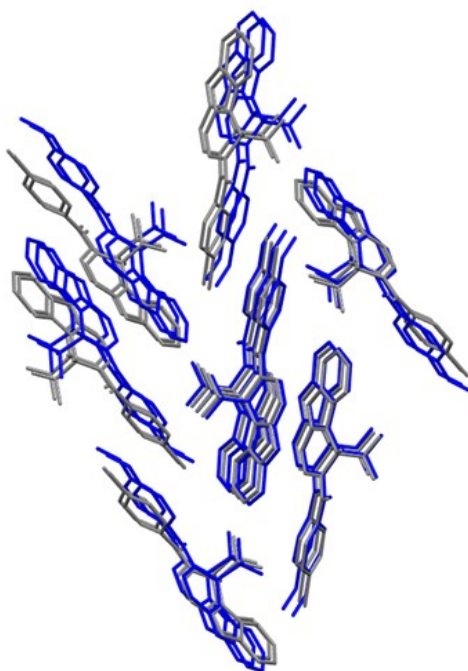

**Figure S18.** Supramolecular cluster overlay of **3** (blue) vs. **4** (grey).

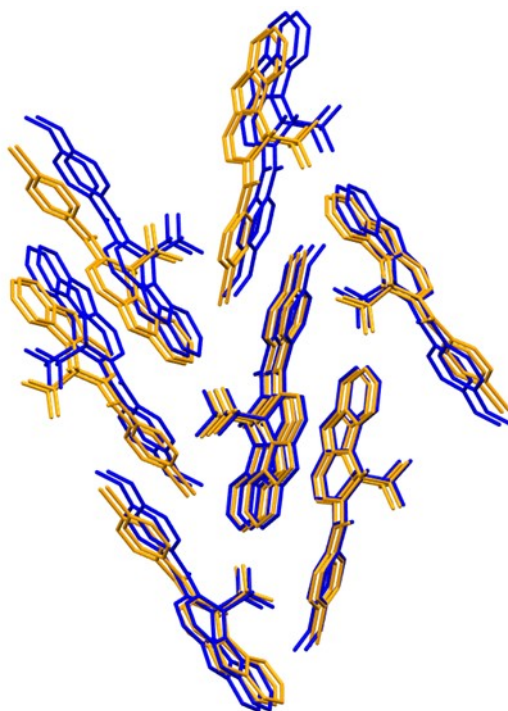

**Figure S19.** Supramolecular cluster overlay of **3** (blue) vs. **5** (yellow).

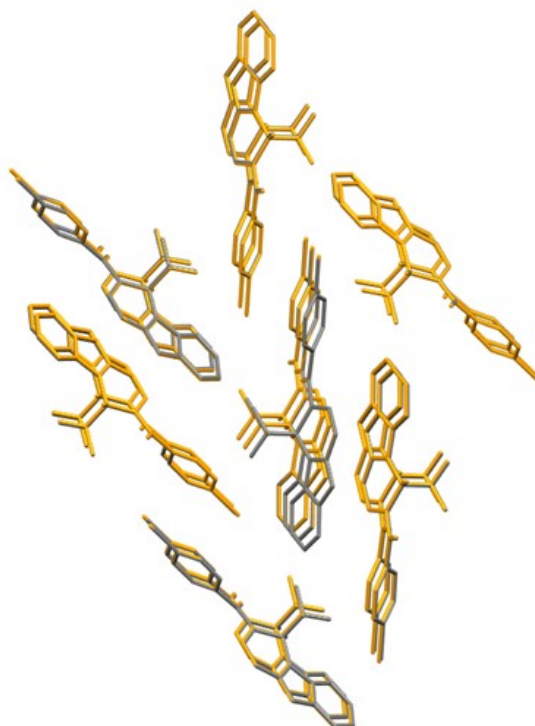

**Figure S20.** Supramolecular cluster overlay of **4** (grey) vs. **5** (yellow).



#### 4. Crystallization mechanism proposals

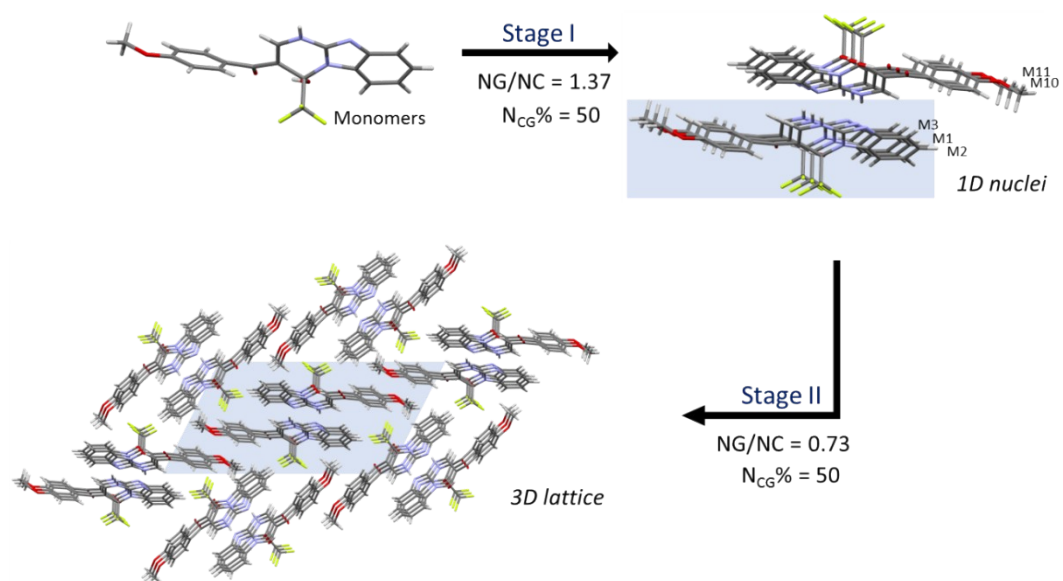

**Figure S21.** The proposed crystallization mechanism for compound 3.

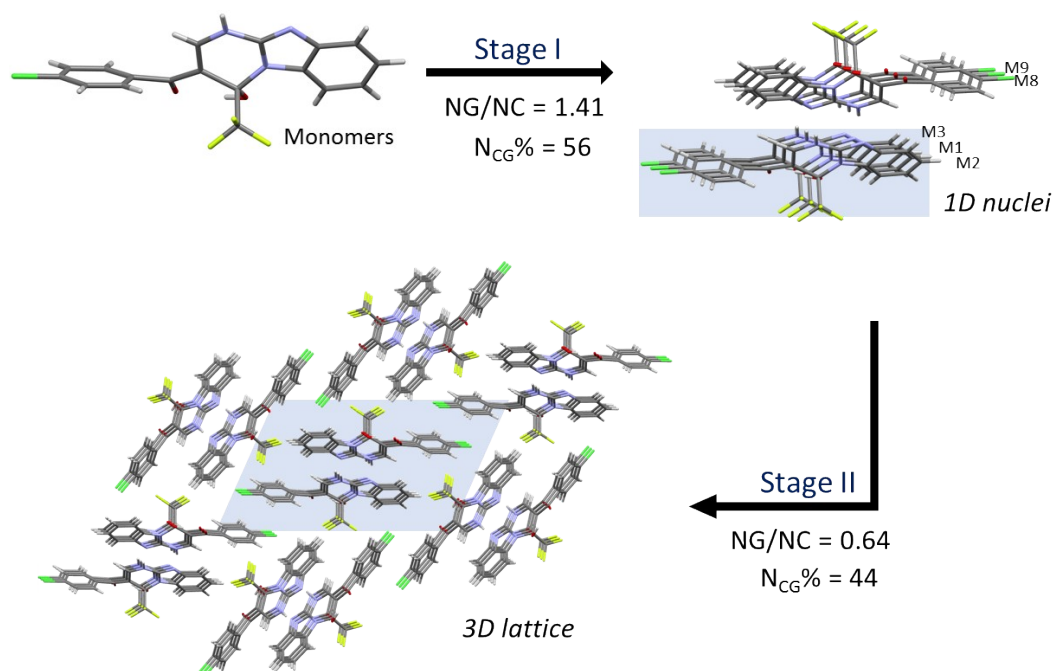

**Figure S22.** The proposed crystallization mechanism for compound 4.



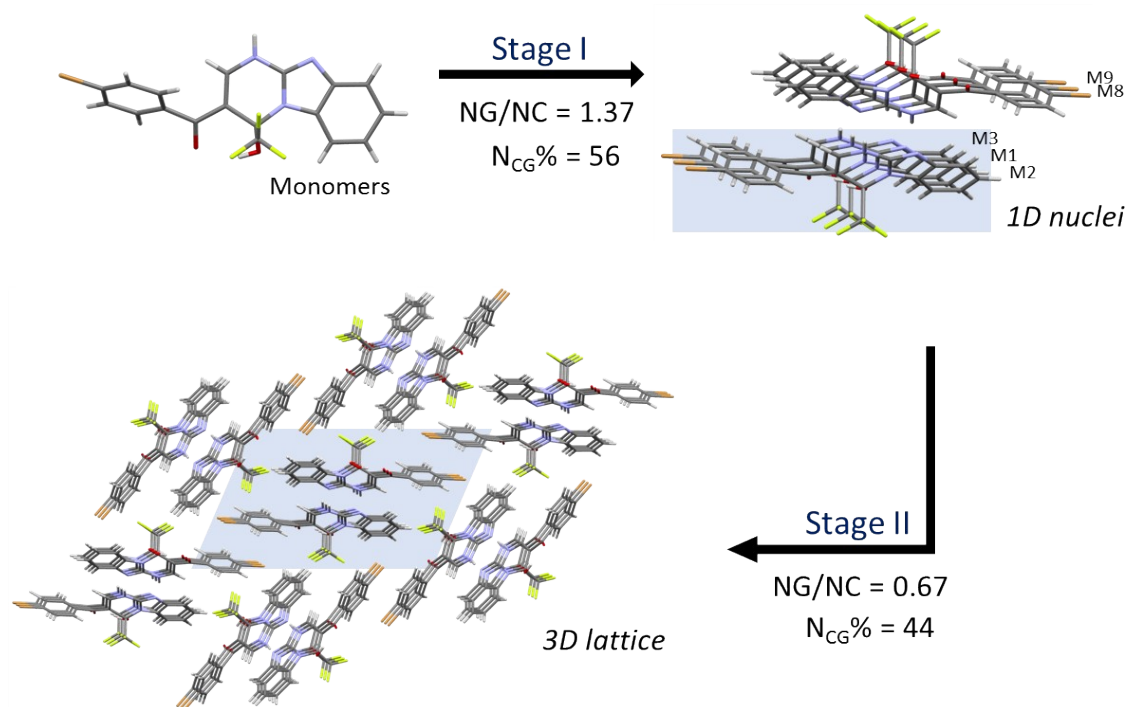

**Figure S23.** The proposed crystallization mechanism for compound 5.

## 5. QTAIM data

**Table S9.** The QTAIM data of dimers M1...M12 and M1...M13 from the supramolecular cluster of compound 1.

| Dimer    | Interaction    | Atoms        | $\rho_{\text{BCP}}$ | $\nabla^2\rho$ | $\varepsilon$ | K           | V           | G          | BPL        | $G_{\text{AI}}^{\text{a}}$ |
|----------|----------------|--------------|---------------------|----------------|---------------|-------------|-------------|------------|------------|----------------------------|
| M1...M13 | $\pi\cdots\pi$ | C10...C1     | 0.0063000           | 0.0162500      | 0.6179420     | -0.0006430  | -0.0027760  | 0.0034190  | 7.0427900  | -3.58                      |
|          | $\pi\cdots\pi$ | C10...C1     | 0.0063000           | 0.0162500      | 0.6179420     | -0.0006430  | -0.0027760  | 0.0034190  | 7.0427900  | -3.58                      |
|          | $\pi\cdots\pi$ | N13...C5     | 0.0050360           | 0.0149300      | 483.4944770   | -0.0005670  | -0.0025990  | 0.0031660  | 6.9665090  | -2.86                      |
|          | $\pi\cdots\pi$ | N13...C5     | 0.0050360           | 0.0149300      | 483.2179390   | -0.0005670  | -0.0025990  | 0.0031660  | 6.9665070  | -2.86                      |
|          | O...N          | O3...N11     | 0.0029800           | 0.0120880      | 0.7384650     | -0.0006060  | -0.0018100  | 0.0024160  | 6.7725000  | -1.69                      |
|          | O...N          | O3...N11     | 0.0029800           | 0.0120880      | 0.7384650     | -0.0006060  | -0.0018100  | 0.0024160  | 6.7725000  | -1.69                      |
|          | $\pi\cdots\pi$ | N4...C12     | 0.0034350           | 0.0120160      | 0.7663740     | -0.0005250  | -0.0019540  | 0.0024790  | 6.7636720  | -1.95                      |
|          | $\pi\cdots\pi$ | N4...C12     | 0.0034350           | 0.0120160      | 0.7663740     | -0.0005250  | -0.0019540  | 0.0024790  | 6.7636720  | -1.95                      |
| M1...M12 | N-H...N        | N13H13...N11 | 0.02757400          | 0.09255800     | 0.07656100    | -0.00228300 | -0.01857300 | 0.02085600 | 3.88554100 | -8.85                      |
|          | N-H...N        | N13H13...N11 | 0.02757400          | 0.09255800     | 0.07656100    | -0.00228300 | -0.01857300 | 0.02085600 | 3.88554200 | -8.85                      |

<sup>a</sup> Obtained by the equation  $G_{\text{AI}(X\cdots Y)} = (\rho_{\text{BCP}}/\Sigma\rho_{\text{BCP}}) \times G_{\text{M1}\cdots\text{MN}}$ .

## 6. Abbreviation List

**Table S9.** Abbreviations used for supramolecular cluster and similarity indices calculations.

| Abbreviation          | Definition                                                                                                                                                        |
|-----------------------|-------------------------------------------------------------------------------------------------------------------------------------------------------------------|
| SC                    | Supramolecular Cluster                                                                                                                                            |
| M1                    | Reference molecule of the Supramolecular Cluster                                                                                                                  |
| MN                    | Molecule that composes the Supramolecular Cluster                                                                                                                 |
| M1⋯MN                 | Dimer formed between the M1 and MN molecules                                                                                                                      |
| G                     | Stabilization Energy                                                                                                                                              |
| C                     | Contact Area                                                                                                                                                      |
| G <sub>M1</sub>       | Stabilization Energy of the M1 molecule                                                                                                                           |
| G <sub>MN</sub>       | Stabilization Energy of the MN molecule                                                                                                                           |
| G <sub>M1+MN</sub>    | Total stabilization energy value of the considered dimer                                                                                                          |
| G <sub>M1⋯MN</sub>    | Intermolecular stabilization energy value of the considered dimer                                                                                                 |
| C <sub>M1⋯MN</sub>    | Contact area value of the considered dimer                                                                                                                        |
| N                     | Molecular Coordination Number                                                                                                                                     |
| I <sup>X</sup>        | Similarity Index                                                                                                                                                  |
| I <sup>D</sup>        | Geometric Similarity Index                                                                                                                                        |
| I <sup>C</sup>        | Contact Area Similarity Index                                                                                                                                     |
| I <sup>G</sup>        | Stabilization Energy Similarity Index                                                                                                                             |
| I <sup>mp</sup>       | Multiparameter Similarity Index                                                                                                                                   |
| I <sup>DCG</sup>      | Multiparameter Similarity Index considering Geometric, Contact Area, and Stabilization Energy Parameters                                                          |
| ND <sub>i</sub>       | Normalized geometric data                                                                                                                                         |
| i                     | Value used to normalize the geometric parameter ( $i = m \times N$ )                                                                                              |
| m                     | Number of atom-atom distances between the monomers of the considered dimer                                                                                        |
| NG                    | Normalized Stabilization Energy data                                                                                                                              |
| NC                    | Normalized Contact Area data                                                                                                                                      |
| NG <sub>predict</sub> | Predicted Normalized Stabilization Energy data                                                                                                                    |
| NC <sub>predict</sub> | Predicted Normalized Contact Area data                                                                                                                            |
| N <sub>CG</sub> %     | Contribution of the considered crystallization mechanism stage in relation to the total crystallization process in terms of stabilization energy and contact area |
| NG/NC                 | Parameter that drives the considered crystallization mechanism stage                                                                                              |
